# Supplementary material for: Integrative Metabolic Signatures for Hepatic Radiation Injury
Source: PLoS One. 2015 Jun 5;10(6):e0124795. doi: 10.1371/journal.pone.0124795 (PMC4457483; doi:10.1371/journal.pone.0124795)
Supplement: S2 Dataset — 247 significantly changed metabolites in plasma and liver for WLI. This is a subset of the metabolites shown in S1 Fig, representing only the most significant and consistent metabolomic changes following WLI, and pathway ontologies. Significantly different metabolites, determined by ANOVA were confirmed by validation of the metabolite as being significant in the 50 Gy vs untreated data sets. If the metabolite was still unconfirmed, it was tested as being significant in the 10 Gy vs. 0 Gy plasma or liver data set, or the 10 Gy vs. untreated data sets. These validations are indicated by X. YY indicates metabolites that were found only at one Gy in either liver or plasma, not confirmed from WLI data sets. However, YY metabolites were confirmed from WBI studies. Also shown are WBI metabolites and the validations indicating WBI plasma metabolite significance, and cross validations between WBI liver and plasma. NA-not applicable indicates metabolites that are not significant. (XLS) [file pone.0124795.s002.xls]

## Sheet: Sheet1
								PLASMA				PLASMA			LIVER				LIVER
				WLI validation	WLI validation	WLI validation	liver irradiation only					WBI		liver irradiation only					WBI	WBI liver vs WBI plasma validation	WLI plasma vs WBI plasma validation	WLI liver vs WBI liver validation
ID	Superpathway	Subpathway	COMPOUND	for plasma metabolites only	for liver metabolites only	For liver vs plasma metabolites	50Gy_Un	50Gy_0Gy	10Gy_0Gy	10Gy_Un		10Gy_0Gy		50Gy_Un	50Gy_0Gy	10Gy_0Gy	10Gy_Un		10Gy_v_0Gy
1585	Amino acid	Alanine and aspartate metabolism	N-acetylalanine				NA	NA	NA	NA		0.68		NA	NA	NA	NA		1.21	N-acetylalanine
5086	Amino acid	Glycine, serine and threonine metabolism	dimethylglycine				NA	NA	NA	NA		0.82		NA	NA	NA	NA		0.79	dimethylglycine
1444	Amino acid	Lysine metabolism	pipecolate- see #30 isobar 56				NA	NA	NA	NA		0.78		NA	NA	NA	NA		0.83	pipecolate
32553	Amino acid	Phenylalanine & tyrosine metabolism	phenol sulfate see #134	see #30			NA	NA	NA	NA		0.56		NA	NA	NA	NA		0.59	phenol sulfate
33945	Amino acid	Phenylalanine & tyrosine metabolism	phenylacetylglycine	see #134			NA	NA	NA	NA		0.66		NA	NA	NA	NA		0.52	phenylacetylglyciine
35107	Amino acid	Valine, leucine and isoleucine metabolism	isovalerylglycine				NA	NA	NA	NA		0.51		NA	NA	NA	NA		0.63	isovalerylglycine
1126	Amino acid	Alanine and aspartate metabolism	alanine		X		NA	NA	NA	NA		NA		0.76	0.73	NA	NA		NA
512	Amino acid	Alanine and aspartate metabolism	asparagine	X			0.75	0.7	NA	NA		NA		NA	NA	NA	NA		NA
15996	Amino acid	Alanine and aspartate metabolism	aspartate		X		NA	NA	NA	NA		NA		0.47	0.54	NA	0.72		NA
1577	Amino acid	Butanoate metabolism	2-amino-butyrate		X		NA	NA	NA	NA		NA		0.44	0.51	0.71	0.6		NA
513	Amino acid	Creatine metabolism	creatinine		X		NA	NA	NA	NA		NA		0.59	0.61	NA	NA		NA
590	Amino acid	Cysteine, methionine, SAM, taurine metabolism	hypotaurine		X		NA	NA	NA	NA		NA		0.45	NA	0.57	0.33		NA
1302	Amino acid	Cysteine, methionine, SAM, taurine metabolism	methionine		X		NA	NA	NA	NA		NA		0.66	0.78	NA	0.85		NA
15948	Amino acid	Cysteine, methionine, SAM, taurine metabolism	S-adenosyl-l-homocysteine		X		NA	NA	NA	NA		NA		1.4	1.24	NA	1.19		NA
2125	Amino acid	Cysteine, methionine, SAM, taurine metabolism	taurine		X		NA	NA	NA	NA		NA		NA	NA	0.47	0.36		NA
57	Amino acid	Glutamate metabolism	glutamic acid		X		NA	NA	NA	NA		NA		0.43	0.49	0.66	0.58		NA
53	Amino acid	Glutamate metabolism	glutamine		X	X	NA	0.69	NA	NA		NA		2.51	1.77	NA	NA		NA
1494	Amino acid	Glutathione metabolism	5-oxoproline		X		NA	NA	NA	NA		NA		0.78	0.83	NA	0.84		NA
27727	Amino acid	Glutathione metabolism	glutathione, oxidized		X		NA	NA	NA	NA		0.4		0.85	NA	NA	0.86		NA
11777	Amino acid	Glycine, serine and threonine metabolism	glycine		X	X	1.46	NA	NA	1.43		NA		NA	0.81	NA	NA		NA
1648	Amino acid	Glycine, serine and threonine metabolism	serine		X		NA	NA	NA	NA		NA		0.77	0.78	NA	NA		NA
1284	Amino acid	Glycine, serine and threonine metabolism	threonine	X	X	X	0.76	0.75	NA	NA		NA		0.74	0.8	NA	NA		NA
22026	Amino acid	Guanidino and acetamido metabolism	1-methylguanidine	X			1.35	1.29	NA	1.25		NA		NA	NA	NA	NA		NA
15681	Amino acid	Guanidino and acetamido metabolism	4-Guanidinobutanoic acid				NA	NA	NA	NA		0.49		NA	NA	NA	NA		0.63	4-Guanidinobutanoic acid
15677	Amino acid	Histidine metabolism	3-methyl-L-histidine		X		NA	NA	NA	NA		NA		0.71	NA	NA	0.79		NA
1574	Amino acid	Histidine metabolism	histamine		X		NA	NA	NA	NA		NA		NA	NA	0.46	0.45		NA
21418	Amino acid	Lysine metabolism	Isobar 56 includes DL-pipecolic acid,1-amino-1-cyclopentanecarboxylic acid	X	X	X	1.85	1.66	NA	1.35		0.78*		1.53	1.81	NA	NA		NA		Isobar 56 includes DL-pipecolic acid,1-amino-1-cyclopentanecarboxylic acid
1301	Amino acid	Lysine metabolism	lysine	X	X	X	0.73	0.61	NA	NA		NA		2.38	1.97	NA	NA		NA
22130	Amino acid	Phenylalanine & tyrosine metabolism	DL-3-phenyllactic acid	YY			3.33	NA	NA	NA		0.73		NA	NA	NA	NA		NA		DL-3-phenyllactic acid
1299	Amino acid	Phenylalanine & tyrosine metabolism	tyrosine		X		NA	NA	NA	NA		NA		0.74	0.86	NA	NA		1.09			tyrosine
1419	Amino acid	Polyamine metabolism	5'-s-methyl-5'-thioadenosine		X		NA	NA	NA	NA		NA		1.67	1.73	NA	NA		NA
27672	Amino acid	Tryptophan metabolism	3-indoxyl sulfate	X			4.11	3.02	2.23	3.03		0.6		NA	NA	NA	NA		0.5	3-indoxyl sulfate	3-indoxyl sulfate
18349	Amino acid	Tryptophan metabolism	DL-indole-3-lactic acid	YY			NA	1.55	NA	NA		0.65		NA	NA	NA	NA		NA		DL-indole-3-lactic acid
1417	Amino acid	Tryptophan metabolism	kynurenic acid		X		NA	NA	NA	NA		NA		0.41	0.52	NA	0.58		NA
15140	Amino acid	Tryptophan metabolism	L-kynurenine		X		NA	NA	NA	NA		0.82		0.36	0.59	NA	0.52		NA
54	Amino acid	Tryptophan metabolism	tryptophan		X		NA	NA	NA	NA		NA		0.71	0.78	NA	0.83		1.14			tryptophan
2132	Amino acid	Urea cycle; arginine-, proline-, metabolism	citrulline		X		NA	NA	NA	NA		0.72		NA	NA	NA	NA		0.82	citrulline
15743	Amino acid	Urea cycle; arginine-, proline-, metabolism	N-N-dimethylarginine		X		NA	NA	NA	NA		NA		0.42	0.59	NA	NA		NA
1898	Amino acid	Urea cycle; arginine-, proline-, metabolism	proline		X		NA	NA	NA	NA		NA		0.69	0.83	NA	0.87		NA
1366	Amino acid	Urea cycle; arginine-, proline-, metabolism	trans-4-hydroxyproline	YY			1.44	NA	NA	NA		NA		NA	NA	NA	NA		0.72
1670	Amino acid	Urea cycle; arginine-, proline-, metabolism	urea	X			1.48	1.54	NA	NA		0.82		NA	NA	NA	NA		0.79	urea	urea
14715	Amino acid	Urea cycle; arginine-, proline-, metabolism	X-3653 - Possible stachydrine see #138	X		X	1.96	NA	NA	1.71		0.71		1.95	NA	NA	NA		NA
1125	Amino acid	Valine, leucine and isoleucine metabolism	isoleucine		x		NA	NA	NA	NA		NA		0.69	NA	NA	0.75		NA
60	Amino acid	Valine, leucine and isoleucine metabolism	leucine		X	X	NA	NA	NA	0.69		NA		0.75	NA	NA	0.83		NA
1587	Amino acid	Valine, leucine and isoleucine metabolism	N-acetyl-L-leucine		X		NA	NA	NA	NA		0.59		NA	NA	NA	NA		0.58	N-acetyl-L-leucine
1591	Amino acid	Valine, leucine and isoleucine metabolism	N-acetyl-L-valine		X		NA	NA	NA	NA		NA		0.64	0.58	NA	NA		NA
1649	Amino acid	Valine, leucine and isoleucine metabolism	valine		X		NA	NA	NA	NA		NA		0.72	NA	NA	0.77		1.1			valine
5765	Amino acid	Valine, leucine and isoleucine metabolism	X-1142 - possible 5-hydroxypentanoate or beta-hydroxyisovaleric acid		X		NA	NA	NA	NA		NA		0.66	NA	NA	0.6		NA
31478	Calcium signaling		Nicotinic acid-adenine-dinucleotide-phosphate-sodium-salt		X		NA	NA	NA	NA		NA		0.44	0.68	NA	0.65		NA
577	Carbohydrate metabolism	Fructose, mannose, galactose, starch, and sucrose metabolism	fructose				NA	NA	NA	NA		0.77		NA	NA	NA	NA		0.75	fructose
21296	Carbohydrate metabolism	Aminosugars metabolism	glucosamine-6-sulfate		X		NA	NA	NA	NA		NA		0.42	0.47	NA	NA		NA
16247	Carbohydrate metabolism	Aminosugars metabolism	Isobar-15-includes-alpha-D-glucosamine-1-phosphate-D-glucosamine-6-phosphate		X		NA	NA	NA	NA		NA		0.55	NA	NA	0.61		NA
16236	Carbohydrate metabolism	Aminosugars metabolism	Isobar-32-includes-N-acetyl-D-glucosamine-N-acetyl-D-mannosamine		X		NA	NA	NA	NA		NA		0.37	0.42	NA	NA		NA
2766	Carbohydrate metabolism	Aminosugars metabolism	N-acetyl-D-galactosamine		X		NA	NA	NA	NA		NA		0.37	0.5	NA	NA		NA
15060	Carbohydrate metabolism	Aminosugars metabolism	N-acetyl-D-mannosamine		X		NA	NA	NA	NA		NA		0.31	0.35	NA	NA		NA
27722	Carbohydrate metabolism	Fructose, mannose, galactose, starch, and sucrose metabolism	erythrose		X		NA	NA	NA	NA		NA		0.67	NA	NA	0.73		NA
15566	Carbohydrate metabolism	Fructose, mannose, galactose, starch, and sucrose metabolism	mannose-1-phosphate		X		NA	NA	NA	NA		NA		9.93	7.45	NA	2.13		NA
1469	Carbohydrate metabolism	Fructose, mannose, galactose, starch, and sucrose metabolism	mannose-6-phosphate		X		NA	NA	NA	NA		NA		6.75	6.36	1.81	1.92		NA
15053	Carbohydrate metabolism	Fructose, mannose, galactose, starch, and sucrose metabolism	sorbitol		X		NA	NA	NA	NA		NA		0.23	0.42	0.39	0.21		0.8			sorbitol
1414	Carbohydrate metabolism	Glycolysis, gluconeogenesis, pyruvate metabolism	3-phospho-d-glycerate		X		NA	NA	NA	NA		NA		0.44	0.43	0.5	0.51		NA
20488	Carbohydrate metabolism	Glycolysis, gluconeogenesis, pyruvate metabolism	D-glucose		YY		NA	NA	NA	NA		NA		1.31	NA	NA	NA		0.88			D-glucose
31260	Carbohydrate metabolism	Glycolysis, gluconeogenesis, pyruvate metabolism	glucose-6-phosphate		X		NA	NA	NA	NA		NA		8.23	5.72	NA	2.09		NA
527	Carbohydrate metabolism	Glycolysis, gluconeogenesis, pyruvate metabolism	lactate		X		NA	NA	NA	NA		NA		1.39	1.28	NA	NA		NA
561	Carbohydrate metabolism	Nucleotide sugars, pentose metabolism	alpha-D-ribose-5-phosphate		X		NA	NA	NA	NA		NA		6.72	2.76	NA	2.71		NA
15964	Carbohydrate metabolism	Nucleotide sugars, pentose metabolism	D-arabitol		X		NA	NA	NA	NA		NA		0.4	0.36	NA	NA		NA
18344	Carbohydrate metabolism	Nucleotide sugars, pentose metabolism	D-xylulose		X		NA	NA	NA	NA		NA		3.18	2.16	NA	2.13		NA
587	Carbohydrate metabolism	Nucleotide sugars, pentose metabolism	gluconic acid		X		NA	NA	NA	NA		NA		0.66	0.63	NA	NA		NA
1475	Carbohydrate metabolism	Nucleotide sugars, pentose metabolism	ribulose-5-phosphate		X		NA	NA	NA	NA		NA		9.95	8.44	NA	NA		NA
4966	Carbohydrate metabolism	Nucleotide sugars, pentose metabolism	xylitol		X		NA	NA	NA	NA		NA		NA	1.33	NA	0.81		NA
16239	Carbohydrate metabolism	Trisaccharide	Isobar-31-includes-1-kestose-maltotriose-melezitose		X		NA	NA	NA	NA		NA		1.69	NA	NA	1.83		NA
41754	Cofactors and vitamins	Hemoglobin and porphyrin metabolism	heme				NA	NA	NA	NA		0.56		NA	NA	NA	NA		0.42	heme
32401	Cofactors and vitamins	Nicotinate and nicotinamide metabolism	trigonelline (N'-methylnicotinate)				NA	NA	NA	NA		0.62		NA	NA	NA	NA		0.68	trigonelline (N'-methylnicotinate)
594	Cofactors and vitamins	Nicotinate and nicotinamide metabolism	niacinamide	X			1.85	2.1	NA	NA		0.71		NA	NA	NA	NA		0.88	niacinamide	niacinamide
31480	Cofactors and vitamins	Nicotinate and nicotinamide metabolism	niacinamide		X		NA	NA	NA	NA		NA		1.4	1.22	NA	1.22		NA
10921	Cofactors and vitamins	Nicotinate and nicotinamide metabolism	X-2558-possible-N1-methyl-2-pyridone-5-carboxamide-and-others		X		NA	NA	NA	NA		NA		NA	NA	2.8	2.53		NA
1508	Cofactors and vitamins	Pantothenate and CoA metabolism	pantothenic acid		X		NA	NA	NA	NA		NA		0.52	0.63	0.8	0.66		NA
1827	Cofactors and vitamins	Riboflavin metabolism	riboflavine	X	X	X	1.76	1.8	NA	NA		0.7		0.5	0.63	NA	0.67		NA		riboflavine
15799	Cofactors and vitamins	Thiamine metabolism	thiamin-monophosphate		X		NA	NA	NA	NA		NA		NA	1.36	1.82	1.66		NA
1564	Energy metabolism	Krebb cycle	citrate		X		NA	NA	NA	NA		0.7		6.33	4.93	NA	2.85		NA
1643	Energy metabolism	Krebb cycle	fumaric acid		X		NA	NA	NA	NA		0.56		0.66	0.69	0.72	0.69		0.82	fumaric acid		fumaric acid
1303	Energy metabolism	Krebb cycle	malic acid	X	X	X	1.87	NA	NA	1.53		NA		0.56	0.64	0.72	0.63		NA
11438	Energy metabolism	Oxidative phosphorylation	phosphate		X		NA	NA	NA	NA		NA		0.93	0.95	NA	NA		NA
18467	Lipid metabolism	Essential fatty acid	eicosapentaenoate (EPA; 20:5n3)				NA	NA	NA	NA		0.75		NA	NA	NA	NA		1.69	eicosapentaenoate (EPA; 20:5n3)
37253	Lipid metabolism	Fatty acid, dicarboxylate	2-hydroxyglutarate				NA	NA	NA	NA		0.6		NA	NA	NA	NA		0.74	2-hydroxyglutarate
32418	Lipid metabolism	Long chain fatty acid	myristoleate (14:1n5)				NA	NA	NA	NA		1.71		NA	NA	NA	NA		2.35	myristoleate (14:1n5)
33447	Lipid metabolism	Long chain fatty acid	palmitoleate (16:1n7)				NA	NA	NA	NA		1.53		NA	NA	NA	NA		1.65	palmitoleate (16:1n7)
35305	Lipid metabolism	Lysolipid	1-palmitoylglycerophosphoinositol*				NA	NA	NA	NA		0.61		NA	NA	NA	NA		0.71	1-palmitoylglycerophosphoinositol
27447	Lipid metabolism	Monoacylglycerol	1-linoleoylglycerol (1-monolinolein)				NA	NA	NA	NA		0.66		NA	NA	NA	NA		4.11	1-linoleoylglycerol (1-monolinolein)
37506	Lipid metabolism	Sphingolipid	palmitoyl sphingomyelin				NA	NA	NA	NA		1.43		NA	NA	NA	NA		1.34	palmitoyl sphingomyelin
22145	Lipid metabolism	Carnitine metabolism	acetyl-L-carnitine		X		NA	NA	NA	NA		NA		0.24	0.37	NA	0.5		NA
1105	Lipid metabolism	Fatty acid, diene	Linoleic acid		X		NA	NA	NA	NA		NA		0.65	0.66	NA	NA		1.56			Linoleic acid
1570	Lipid metabolism	Fatty acid, monoene	oleic acid	X			NA	1.59	NA	0.65		NA		NA	NA	NA	NA		NA
1507	Lipid metabolism	Fatty acid, monoene	palmitoleic acid			X	NA	1.92	NA	NA		NA		NA	1.65	NA	NA		NA
19323	Lipid metabolism	Fatty acid, polyene	Docosahexaenoic Acid				NA	NA	NA	NA		0.79		NA	NA	NA	NA		1.37	Docosahexaenoic Acid
1336	Lipid metabolism	Fatty acid, saturated, even	n-hexadecanoic acid		YY		NA	NA	NA	NA		NA		0.81	NA	NA	NA		1.29			n-hexadecanoic acid
1365	Lipid metabolism	Fatty acid, saturated, even	tetradecanoic acid	X			NA	1.44	NA	0.67		NA		NA	NA	NA	NA		1.6
12035	Lipid metabolism	Fatty acid, saturated, odd	nonanoate		X		NA	NA	NA	NA		NA		1.63	1.68	NA	NA		NA
15506	Lipid metabolism	Glycerolipid metabolism	choline	X	X	X	NA	1.71	1.56	NA		NA		1.59	1.81	NA	NA		NA
15122	Lipid metabolism	Glycerolipid metabolism	glycerol	YY			NA	1.36	NA	NA		NA		NA	NA	NA	NA		1.78
15990	Lipid metabolism	Glycerolipid metabolism	L-alpha-glycerophosphorylcholine		X		NA	NA	NA	NA		NA		5.92	3.45	NA	NA		NA
19934	Lipid metabolism	Inositol metabolism	inositol	X	X	X	1.8	NA	NA	1.59		0.68		1.62	1.73	1.36	1.27		0.79	inositol	inositol	inositol
542	Lipid metabolism	Ketone bodies	3-hydroxybutanoic acid		YY		NA	NA	NA	NA		1.71		0.59	NA	NA	NA		NA
63	Lipid metabolism	Sterol/Steroid	cholesterol		X		NA	NA	NA	NA		1.21		0.78	0.81	NA	NA		NA
15712	Lipid metabolism	Sterol/Steroid	isopentenyl-diphosphate		X		NA	NA	NA	NA		NA		NA	NA	1.6	1.69		NA
3127	Nucleotide metabolism	Purine metabolism, (hypo)xanthine/inosine containing	hypoxanthine		X		NA	NA	NA	NA		NA		0.66	0.71	NA	0.88		NA
1123	Nucleotide metabolism	Purine metabolism, (hypo)xanthine/inosine containing	inosine		X		NA	NA	NA	NA		NA		2.28	1.92	1.29	1.52		NA
3147	Nucleotide metabolism	Purine metabolism, (hypo)xanthine/inosine containing	xanthine		X		NA	NA	NA	NA		NA		0.72	0.77	0.9	0.85		NA
554	Nucleotide metabolism	Purine metabolism, adenine containing	adenine		X		NA	NA	NA	NA		NA		2.48	1.59	NA	1.69		NA
555	Nucleotide metabolism	Purine metabolism, adenine containing	adenosine		X		NA	NA	NA	NA		NA		3.35	2.83	NA	1.55		NA
2832	Nucleotide metabolism	Purine metabolism, adenine containing	adenosine 5'-monophosphate		X		NA	NA	NA	NA		NA		4.34	3.84	1.59	1.8		NA
1573	Nucleotide metabolism	Purine metabolism, guanine containing	guanosine		X		NA	NA	NA	NA		NA		2.65	2	1.32	1.74		NA
2849	Nucleotide metabolism	Purine metabolism, guanine containing	guanosine 5'- monophosphate		X		NA	NA	NA	NA		NA		7.67	5.7	1.95	2.63		0.79	allantoin
1107	Nucleotide metabolism	Purine metabolism, urate metabolism	allantoin		X		NA	NA	NA	NA		0.71		1.3	1.38	NA	NA					allantoin
22808	Nucleotide metabolism	Purine metabolism, urate metabolism	allantoin	X	X		1.85	1.48	NA	NA		NA		NA	NA	NA	NA		NA
514	Nucleotide metabolism	Pyrimidine metabolism, cytidine containing	cytidine		X		NA	NA	NA	NA		NA		0.56	0.67	NA	0.68		NA
8457	Nucleotide metabolism	Pyrimidine metabolism, cytidine containing	X-2035-Possible-5-methyl-deoxycytidine-monophosphate		X		NA	NA	NA	NA		NA		0.77	0.77	NA	NA		NA
1505	Nucleotide metabolism	Pyrimidine metabolism, orotate containing	orotic acid	X			1.43	1.44	NA	NA		0.65		NA	NA	NA	NA		NA		orotic acid
1412	Nucleotide metabolism	Pyrimidine metabolism, uracil containing	2'-deoxyuridine			X	NA	NA	NA	1.43		1.57		NA	0.53	NA	NA		NA		2'-deoxyuridine
605	Nucleotide metabolism	Pyrimidine metabolism, uracil containing	uracil			X	NA	NA	NA	0.55		NA		0.65	0.71	NA	NA		NA
606	Nucleotide metabolism	Pyrimidine metabolism, uracil containing	uridine		X	X	NA	NA	NA	NA		NA		0.6	0.64	0.8	0.74		1.11			uridine
15129	Peptide	Dipeptide	D-alanyl-D-alanine	X			NA	NA	1.91	1.45		NA		NA	NA	NA	NA		NA
22175	Peptide	Dipeptide	l-aspartyl-l-phenylalanine	X			4.06	NA	0.5	NA		NA		NA	NA	NA	NA		NA
14054	Peptide	Dipeptide	X-3430-possible-gly-leu-acetyl-lys-ala-val		X		NA	NA	NA	NA		NA		1.41	NA	NA	1.39		NA
16244	Peptide	Dipeptide derivative	Isobar 21 includes gamma-aminobutyryl-L-histidine, L-anserine		X		NA	NA	NA	NA		NA		1.84	NA	NA	1.5		NA
22154	Peptide	Polypeptide	bradykinin	X			14.6	26.03	NA	NA		NA		NA	NA	NA	NA		NA
15504	Peptide	Protein component	phosphopantheine	X			2.92	NA	NA	2.05		NA		NA	NA	NA	NA		NA
18369	Peptide	γ-glutamyl	gamma-glu-leu			X	1.35	NA	NA	NA		0.8		NA	NA	NA	1.31		NA		gamma-glu-leu
21018	Xenobiotics	Bacterial	3-hydroxycinnamic acid	X			2.1	1.36	NA	1.5		NA		NA	NA	NA	NA		NA
15753	Xenobiotics	Benzoate metabolism	hippuric acid	X			NA	NA	2.26	1.52		0.57		NA	NA	NA	NA		NA		hippuric acid
10245	Xenobiotics	Chemical	X-2269	X			1.57	1.36	NA	NA		NA		NA	NA	NA	NA		NA
15253	Xenobiotics	Chemical	X-3832 - possible phenol sulfate	X			2.57	NA	NA	1.92		0.56		NA	NA	NA	NA		NA		X-3832 - possible phenol sulfate
38637	Xenobiotics	Food component/Plant	cinnamoylglycine				NA	NA	NA	NA		0.57		NA	NA	NA	NA		0.56	cinnamoylglycine
40478	Xenobiotics	Food component/Plant	equol sulfate				NA	NA	NA	NA		0.56		NA	NA	NA	NA		0.65	equol sulfate
33009	Xenobiotics	Food component/Plant	homostachydrine*				NA	NA	NA	NA		0.65		NA	NA	NA	NA		0.56	homostachydrine
34384	Xenobiotics	Food component/Plant	stachydrine				NA	NA	NA	NA		0.71		NA	NA	NA	NA		0.57	stachydrine
6373			A - 1304	X			0.2	0.26	NA	0.48		NA		NA	NA	NA	NA		NA
24331			X-10127	X			1.78	2.1	NA	NA		NA		NA	NA	NA	NA		NA
25416			X-10363	X			3.7	4.2	NA	NA		NA		NA	NA	NA	NA		NA
25429			X-10369	X			NA	2.33	NA	0.62		NA		NA	NA	NA	0.57		NA
25548			X-10419	X		X	0.53	0.46	NA	NA		NA		NA	NA	NA	NA		NA
25638			X-10445		X		NA	NA	NA	NA		NA		2.09	1.45	NA	1.7		NA
26410			X-10457		X		NA	NA	NA	NA		NA		0.7	NA	NA	0.72		NA
26449			X-10467	X			2.05	2.05	NA	NA		NA		NA	NA	NA	NA		NA
27138			X-10499		X		NA	NA	NA	NA		NA		0.45	0.56	0.76	0.61		NA
27256			X-10500	X	X	X	0.74	NA	NA	NA		NA		0.81	0.85	NA	NA		NA
27278			X-10510	X			0.58	0.53	NA	NA		NA		NA	NA	NA	NA		NA
27294			X-10519	X	X		NA	NA	NA	NA		NA		0.71	0.59	NA	NA		NA
27838			X-10594		X		NA	NA	NA	NA		NA		0.64	0.68	NA	NA		NA
27866			X-10598	X			NA	3.73	2.36	NA		NA		NA	NA	NA	NA		NA
27883			X-10604		X		NA	NA	NA	NA		NA		0.04	0.05	0.63	0.48		NA
28058			X-10649		X		NA	NA	NA	NA		NA		0.54	0.53	NA	NA		NA
28068			X-10655		X		NA	NA	NA	NA		NA		0.48	0.53	0.68	0.63		NA
28774			X-10677		X		NA	NA	NA	NA		NA		0.79	0.82	NA	NA		NA
30128			X-10687	X	X		NA	1.53	NA	NA		NA		1.86	1.72	NA	NA		NA
30132			X-10688		X		NA	NA	NA	NA		NA		0.56	0.72	NA	0.78		NA
5628			X-1086		X		NA	NA	NA	NA		NA		0.55	NA	1.37	NA		NA
31361			X-10876		X		NA	NA	NA	NA		NA		0.77	NA	NA	0.79		NA
31489			X-10914		X		NA	NA	NA	NA		NA		0.78	0.83	NA	0.83		NA
5689			X-1111-possible-methylnitronitrosoguanidine-or-ethyl-thiocarbamoylacetate		X		NA	NA	NA	NA		NA		1.92	NA	NA	2.69		NA
6398			X-1335		X		NA	NA	NA	NA		NA		0.4	0.47	NA	NA		NA
6851			X-1497		X		NA	NA	NA	NA		NA		NA	NA	1.6	1.61		NA
7650			X-1834		X	X	NA	NA	NA	1.44		NA		1.48	NA	1.74	1.99		NA
7662			X-1840		X		NA	NA	NA	NA		NA		0.64	0.71	NA	NA		NA
8159			X-1971	X			3.97	6.3	NA	0.49		NA		NA	NA	NA	NA		NA
8210			X-1981	X	X	X	2.21	NA	NA	1.81		NA		2.05	1.63	NA	NA		NA
8404			X-2027		X		NA	NA	NA	NA		NA		0.72	0.67	NA	NA		NA
8649			X-2053		X		NA	NA	NA	NA		NA		1.61	1.54	NA	NA		NA
8729			X-2064		X		NA	NA	NA	NA		NA		1.46	NA	NA	1.3		NA
8731			X-2065		X	X	NA	NA	1.94	NA		NA		0.72	NA	NA	0.72		NA
8796			X-2074		X	X	NA	NA	NA	0.38		NA		0.49	NA	NA	0.71		NA
8807			X-2076		X		NA	NA	NA	NA		NA		5.16	NA	0.47	2.43		NA
8840			X-2084		X		NA	NA	NA	NA		NA		NA	0.53	0.49	NA		NA
8945			X-2098		X		NA	NA	NA	NA		NA		0.61	NA	NA	0.71		NA
8954			X-2099		X		NA	NA	NA	NA		NA		0.45	0.63	NA	NA		NA
8968			X-2102				NA	NA	NA	NA		NA		0.57	0.63	NA	NA		NA
9121			X-2136				NA	NA	NA	NA		NA		0.49	0.67	NA	0.69		NA
9130			X-2139		X		NA	NA	NA	NA		NA		0.32	0.42	NA	0.66		NA
9324			X-2173		X		NA	NA	NA	NA		NA		0.84	NA	0.82	0.65		NA
9333			X-2174		X		NA	NA	NA	NA		NA		0.5	NA	NA	0.74		NA
9452			X-2180		X		NA	NA	NA	NA		NA		0.54	0.64	NA	NA		NA
9491			X-2185		X		NA	NA	NA	NA		NA		0.32	0.38	NA	0.63		NA
9599			X-2199		X		NA	NA	NA	NA		NA		0.55	NA	NA	0.62		NA
9918			X-2232		X		NA	NA	NA	NA		NA		2.88	NA	NA	2.24		NA
10148			X-2257	X	X		6.26	NA	0.31	NA		NA		3.08	NA	0.44	NA		NA
10286			X-2272	X			2.06	NA	NA	1.75		NA		NA	NA	NA	NA		NA
10309			X-2277	X			1.56	1.7	NA	NA		NA		NA	NA	NA	NA		NA
10461			X-2313	X			NA	NA	0.56	0.57		NA		NA	NA	NA	NA		NA
10667			X-2389		X		NA	NA	NA	NA		NA		1.44	1.42	NA	NA		NA
10774			X-2466		X		NA	NA	NA	NA		NA		1.43	NA	NA	1.43		NA
11053			X-2567	X	X		2.21	1.58	NA	1.8		NA		1.71	1.54	NA	1.59		NA
12296			X-2866	X			1.82	NA	NA	2.17		NA		NA	NA	NA	NA		NA
12463			X-2893-		X		NA	NA	NA	NA		NA		0.53	NA	NA	0.51		NA
12764			X-3084	X			NA	1.72	NA	0.68		NA		NA	NA	NA	NA		NA
12774			X-3094	X	X	X	1.35	NA	NA	1.39		NA		1.29	1.22	NA	NA		NA
12781			X-3099		X	X	1.78	NA	NA	NA		NA		1.57	1.5	NA	NA		NA
12785			X-3103	X			NA	2.77	3.07	NA		NA		NA	NA	NA	NA		NA
12919			X-3130		X		NA	NA	NA	NA		NA		NA	0.52	0.54	NA		NA
13160			X-3172			X	NA	NA	NA	1.47		NA		NA	NA	NA	2.22		NA
14368			X-3489		X		NA	NA	NA	NA		NA		0.76	0.72	NA	1.23		NA
14481			X-3522	X			1.85	1.85	NA	NA		NA		NA	NA	NA	NA		NA
15606			X-3968		X		NA	NA	NA	NA		NA		0.63	0.61	NA	NA		NA
16019			X-3995		X		NA	NA	NA	NA		NA		NA	1.55	NA	0.68		NA
16060			X-4014		X		NA	NA	NA	NA		NA		1.98	1.91	NA	1.26		NA
16116			X-4051		X		NA	NA	NA	NA		NA		1.86	1.71	NA	NA		NA
16138			X-4080	X			NA	2.59	2.11	NA		NA		NA	NA	NA	NA		NA
16496			X-4251		X		NA	NA	NA	NA		NA		NA	0.74	0.71	NA		NA
16634			X-4357		X		NA	NA	NA	NA		NA		0.47	0.57	NA	0.67		NA
16726			X-4447	X	X		1.59	NA	NA	1.81		NA		NA	NA	NA	NA		NA
16819			X-4496	X			1.25	1.35	1.24	NA		NA		NA	NA	NA	NA		NA
16983			X-4598	X			1.78	2.12	1.55	NA		NA		NA	NA	NA	NA		NA
17043			X-4615		X		NA	NA	NA	NA		NA		0.38	0.48	NA	NA		NA
17171			X-4666		X		NA	NA	NA	NA		NA		0.68	0.73	NA	NA		NA
17648			X-5007			X	NA	NA	NA	0.25		NA		NA	NA	NA	0.36		NA
17919			X-5187		X		NA	NA	NA	NA		NA		NA	1.39	1.32	NA		NA
17962			X-5208		X		NA	NA	NA	NA		NA		0.32	0.46	0.62	0.44		NA
17971			X-5210		X		NA	NA	NA	NA		NA		0.59	0.75	NA	0.7		NA
18446			X-5524		X		NA	NA	NA	NA		NA		0.4	0.46	NA	0.68		NA
18602			X-5650	X			1.45	1.53	NA	NA		NA		NA	NA	NA	NA		NA
18706			X-5769	X			2.71	2.71	NA	NA		NA		NA	NA	NA	NA		NA
18707			X-5770	X			2.78	3.33	NA	NA		NA		NA	NA	NA	NA		NA
19291			X-6132		X		NA	NA	NA	NA		NA		3.52	6.24	NA	NA		NA
19599			X-6649		X		NA	NA	NA	NA		NA		1.96	1.48	1.32	1.74		NA
19733			X-6715		X		NA	NA	NA	NA		NA		0.45	0.3	0.39	0.58		NA
19787			X-6746			X	0.71	NA	NA	NA		NA		0.77	NA	NA	NA		NA
19809			X-6767		X		NA	NA	NA	NA		NA		1.42	NA	NA	1.43		NA
19960			X-6912		X		NA	NA	NA	NA		NA		0.37	0.45	0.71	0.58		NA
20000			X-6972		X		NA	NA	NA	NA		NA		2.1	NA	NA	1.8		NA
20194			X-7147	X			1.53	1.47	1.45	1.51		NA		NA	NA	NA	NA		NA
20237			X-7171		X		NA	NA	NA	NA		NA		NA	NA	3.8	4.85		NA
20303			X-7269		X		NA	NA	NA	NA		NA		1.35	NA	1.29	1.37		NA
20327			X-7276		X		NA	NA	NA	NA		NA		0.63	0.66	NA	NA		NA
20390			X-7333		X		NA	NA	NA	NA		NA		0.37	0.39	0.58	0.54		NA
20736			X-7707		X		NA	NA	NA	NA		NA		0.39	NA	2.52	NA		NA
20737			X-7708		X		NA	NA	NA	NA		NA		0.52	NA	NA	0.65		NA
20943			X-7828	X	X	X	2.09	2.17	NA	NA		NA		1.97	NA	NA	2.3		NA
21017			X-7909			X	NA	NA	NA	1.39		NA		NA	NA	NA	1.88		NA
21397			X-8172		X		NA	NA	NA	NA		NA		1.67	1.56	NA	1.37		NA
21631			X-8403	X			0.47	0.6	NA	NA		NA		NA	NA	NA	NA		NA
21812			X-8562		X		NA	NA	NA	NA		NA		1.9	1.64	1.59	1.84		NA
22344			X-8895		X		NA	NA	NA	NA		NA		0.29	0.38	NA	NA		NA
22414			X-8933		X		NA	NA	NA	NA		NA		0.44	0.49	NA	NA		NA
22432			X-8947		X		NA	NA	NA	NA		NA		0.46	0.61	NA	NA		NA
22482			X-8989		X		NA	NA	NA	NA		NA		0.53	0.67	0.8	0.63		NA
22702			X-9127		X		NA	NA	NA	NA		NA		3.27	2.38	NA	1.64		NA
22723			X-9166		X		NA	NA	NA	NA		NA		0.66	0.58	NA	NA		NA
22960			X-9410		X		NA	NA	NA	NA		NA		1.32	NA	NA	1.45		NA
24097			X-9739		X		NA	NA	NA	NA		NA		0.71	0.76	NA	NA		NA
24135			X-9789	X			2.2	1.84	NA	NA		NA		NA	NA	NA	NA		NA
